# Supplementary material for: Convergent Evolution in SARS-CoV-2 Spike Creates a Variant Soup from Which New COVID-19 Waves Emerge
Source: MDPI journal article supplement (doi:10.3390/ijms24032264), 2023-01-23
Supplement: s1 [file s1]

### Supplementary Table S1

Occurrence of selected amino acid mutations associated with immune escape within the Spike protein of SARS-CoV-2 in BA.2 and BA.4/5 Omicron sublineages. Modified from [https://docs.google.com/spreadsheets/d/1OTWogpyvWNTlK0ww7TlDcl4l\\_SkZt3Z8nYiSp2YARys/edit?usp=sharing](https://docs.google.com/spreadsheets/d/1OTWogpyvWNTlK0ww7TlDcl4l_SkZt3Z8nYiSp2YARys/edit?usp=sharing)

| <b>PAN<br/>GO<br/>linea<br/>ge</b> | <b>nickn<br/>ame</b> | <b>Y<br/>144<br/>del</b> | <b>R<br/>34<br/>6</b> | <b>K<br/>35<br/>6</b> | <b>K<br/>44<br/>4</b> | <b>V<br/>44<br/>5</b> | <b>G<br/>44<br/>6</b> | <b>N<br/>45<br/>0</b> | <b>L<br/>45<br/>2</b> | <b>N<br/>46<br/>0</b> | <b>F<br/>48<br/>6</b> | <b>F<br/>49<br/>0</b> | <b>R<br/>49<br/>3</b> | <b>S<br/>49<br/>4</b> |
|------------------------------------|----------------------|--------------------------|-----------------------|-----------------------|-----------------------|-----------------------|-----------------------|-----------------------|-----------------------|-----------------------|-----------------------|-----------------------|-----------------------|-----------------------|
| <b>BA.1</b>                        |                      |                          |                       |                       |                       |                       | S                     |                       |                       |                       |                       |                       |                       |                       |
| <b>BA.1.<br/>1</b>                 |                      |                          | K                     |                       |                       |                       | S                     |                       |                       |                       |                       |                       |                       |                       |
| <b>BA.2</b>                        |                      |                          |                       |                       |                       |                       |                       |                       |                       |                       |                       |                       |                       |                       |
| <b>BA.2.<br/>3</b>                 |                      |                          |                       |                       |                       |                       |                       |                       |                       |                       |                       |                       |                       |                       |
| <b>BA.2.<br/>3.2</b>               |                      |                          |                       |                       |                       |                       |                       |                       |                       |                       |                       |                       |                       |                       |
| <b>BS.1</b>                        |                      |                          | T                     |                       |                       |                       |                       |                       | R                     | K                     |                       |                       | Q                     |                       |
| <b>BS.1.<br/>1</b>                 |                      |                          | T                     | T                     |                       |                       |                       |                       | R                     | K                     |                       |                       | Q                     |                       |
| <b>BS.1.<br/>2</b>                 |                      |                          | T                     |                       |                       |                       |                       |                       | R                     | K                     |                       |                       | Q                     |                       |
| <b>BA.2.<br/>3.16</b>              |                      |                          |                       |                       |                       |                       |                       |                       |                       |                       |                       |                       |                       |                       |
| <b>BP.1</b>                        |                      |                          | T                     |                       |                       |                       |                       |                       | M                     |                       |                       |                       |                       |                       |
| <b>BA.2.<br/>3.20</b>              | Basili<br>sk         |                          |                       |                       | R                     |                       |                       | D                     | M                     | K                     |                       |                       | Q                     |                       |
| <b>CM.1</b>                        |                      |                          |                       |                       | R                     |                       |                       | D                     | M                     | K                     |                       |                       | Q                     |                       |
| <b>CM.2</b>                        |                      |                          |                       |                       | R                     |                       |                       | D                     | M                     | K                     |                       |                       | Q                     |                       |
| <b>CM.3</b>                        |                      |                          |                       |                       | R                     |                       |                       | D                     | M                     | K                     |                       |                       | Q                     |                       |
| <b>CM.4</b>                        |                      |                          |                       |                       | R                     |                       |                       | D                     | M                     | K                     |                       |                       | Q                     |                       |
| <b>CM.5</b>                        |                      |                          |                       |                       | R                     |                       |                       | D                     | M                     | K                     |                       |                       | Q                     |                       |
| <b>CM.5.<br/>1</b>                 |                      |                          |                       |                       | R                     |                       |                       | D                     | M                     | K                     |                       |                       | Q                     |                       |
| <b>CM.6</b>                        |                      |                          |                       |                       | R                     |                       |                       | D                     | M                     | K                     |                       |                       | Q                     |                       |
| <b>CM.6.<br/>1</b>                 |                      |                          |                       |                       | R                     |                       |                       | D                     | M                     | K                     |                       |                       | Q                     |                       |
| <b>CM.7</b>                        |                      |                          |                       |                       | R                     |                       |                       | D                     | M                     | K                     | S                     |                       | Q                     |                       |
| <b>CM.8</b>                        |                      |                          |                       |                       | R                     |                       | S                     | D                     | M                     | K                     |                       |                       | Q                     |                       |
| <b>CM.8.<br/>1</b>                 |                      |                          |                       |                       | R                     |                       | S                     | D                     | M                     | K                     | S                     |                       | Q                     |                       |

|              |       |  |   |  |   |   |   |   |   |   |   |   |   |   |
|--------------|-------|--|---|--|---|---|---|---|---|---|---|---|---|---|
| CM.9         |       |  |   |  | R |   |   | D | M | K |   |   | Q |   |
| <b>BA.2.</b> |       |  |   |  |   |   |   |   |   |   |   |   |   |   |
| <b>3.21</b>  |       |  |   |  |   |   |   |   |   |   |   |   | Q |   |
| DD.1         |       |  | T |  |   |   |   |   |   | K |   |   | L |   |
| <b>BA.2.</b> |       |  |   |  |   |   |   |   |   |   |   |   |   |   |
| <b>10</b>    |       |  |   |  |   |   |   |   |   |   |   |   |   |   |
| <b>BA.2.</b> |       |  |   |  |   |   |   |   |   |   |   |   |   |   |
| <b>10.1</b>  |       |  |   |  |   |   |   |   |   |   |   |   |   |   |
| BJ.1         | Argus |  | T |  |   | P | S |   |   |   |   | V |   |   |
| BA.2.        |       |  |   |  |   |   |   |   |   |   |   |   |   |   |
| 10.4         |       |  |   |  |   |   | S |   |   |   | P |   | Q | P |
| <b>BA.2.</b> |       |  |   |  |   |   |   |   |   |   |   |   |   |   |
| <b>38</b>    |       |  |   |  |   |   |   |   |   |   |   |   |   |   |
| BA.2.        |       |  |   |  |   |   |   |   |   |   |   |   |   |   |
| 38.1         |       |  |   |  | N |   |   |   |   |   |   |   |   |   |
| BA.2.        |       |  |   |  |   |   |   |   |   |   |   |   |   |   |
| 38.2         |       |  |   |  | N |   |   |   |   |   |   |   |   |   |
| <b>BA.2.</b> |       |  |   |  |   |   |   |   |   |   |   |   |   |   |
| <b>38.3</b>  |       |  |   |  |   |   |   |   |   |   |   |   |   |   |
| BH.1         |       |  |   |  |   |   | S |   | Q |   |   |   |   |   |
| BA.2.        |       |  |   |  |   |   |   |   |   |   |   |   |   |   |
| 38.4         |       |  |   |  | N |   |   |   |   |   |   |   |   |   |
| <b>BA.2.</b> | Cent  |  |   |  |   |   |   |   |   |   |   |   |   |   |
| <b>75</b>    | aurus |  |   |  |   |   | S |   |   | K |   |   | Q |   |
| <b>BA.2.</b> |       |  |   |  |   |   |   |   |   |   |   |   |   |   |
| <b>75.1</b>  |       |  |   |  |   |   | S |   |   | K |   |   | Q |   |
| <b>BL.1</b>  |       |  | T |  |   |   | S |   |   | K |   |   | Q |   |
| BL.1.        |       |  |   |  |   |   |   |   |   |   |   |   |   |   |
| 1            |       |  | T |  |   |   | S |   |   | K |   |   | Q |   |
| BL.1.        |       |  |   |  |   |   |   |   |   |   |   |   |   |   |
| 2            |       |  | T |  |   |   | S |   |   | K |   |   | Q |   |
| BL.1.        |       |  |   |  |   |   |   |   |   |   |   |   |   |   |
| 3            |       |  | T |  |   |   | S |   |   | K |   | L | Q |   |
| BL.1.        |       |  |   |  |   |   |   |   |   |   |   |   |   |   |
| 4            |       |  | T |  |   |   | S |   |   | K |   | V | Q |   |
| <b>BL.2</b>  |       |  | T |  |   |   | S |   |   | K |   |   | Q |   |
| BL.2.        |       |  |   |  |   |   |   |   |   |   |   |   |   |   |
| 1            |       |  | T |  |   |   | S |   |   | K |   |   | Q |   |
| BL.3         |       |  |   |  |   |   | S |   |   | K |   |   | Q |   |
| BL.4         |       |  |   |  |   |   | S |   |   | K |   |   | Q |   |
| BL.5         |       |  | S |  |   |   | S |   |   | K |   |   | Q |   |
| <b>BA.2.</b> | Chiro |  |   |  |   |   |   |   |   |   |   |   |   |   |
| <b>75.2</b>  | n     |  | T |  |   |   | S |   |   | K | S |   | Q |   |

|                             |           |  |   |  |   |   |  |   |   |   |   |   |   |
|-----------------------------|-----------|--|---|--|---|---|--|---|---|---|---|---|---|
| CA.1                        |           |  | T |  |   | S |  | R | K | S |   | Q |   |
| CA.2                        |           |  | T |  |   | S |  |   | K | S |   | Q | P |
| <b>CA.3</b>                 |           |  | T |  |   | S |  |   | K | S |   | Q |   |
| CA.3.<br>1                  |           |  | T |  | M | S |  | R | K | S |   | Q |   |
| CA.4                        |           |  | T |  |   | S |  |   | K | P |   | Q |   |
| CA.5                        |           |  | T |  |   | S |  |   | K | S |   | Q |   |
| CA.6                        |           |  | T |  |   | S |  |   | K | S |   | Q |   |
| CA.7                        |           |  | T |  |   | S |  | R | K | S |   | Q |   |
| <b>BA.2.</b><br><b>75.3</b> |           |  |   |  |   | S |  |   | K |   |   | Q |   |
| <b>BM.1</b>                 |           |  |   |  |   | S |  |   | K | S |   | Q |   |
| <b>BM.1.</b><br><b>1</b>    |           |  | T |  |   | S |  |   | K | S |   | Q |   |
| <b>BM.1.</b><br><b>1.1</b>  | Mima<br>s |  | T |  |   | S |  |   | K | S | S | Q |   |
| CJ.1                        |           |  | T |  |   | S |  |   | K | P | S | Q |   |
| BM.1.<br>1.2                |           |  | T |  |   | S |  |   | K | S |   | Q |   |
| <b>BM.1.</b><br><b>1.3</b>  |           |  | T |  |   | S |  |   | K | S |   | Q |   |
| CV.1                        |           |  | T |  |   | S |  | R | K | S |   | Q |   |
| <b>BM.2</b>                 |           |  | T |  |   | S |  |   | K |   |   | Q |   |
| BM.2.<br>1                  |           |  | T |  |   | S |  |   | K | V |   | Q |   |
| BM.2.<br>2                  |           |  | T |  |   | S |  |   | K |   |   | Q |   |
| BM.2.<br>3                  |           |  | T |  |   | S |  |   | K | I |   | Q |   |
| BM.3                        |           |  |   |  |   | S |  |   | K |   |   | Q |   |
| <b>BM.4</b>                 |           |  |   |  |   | S |  |   | K |   |   | Q |   |
| <b>BM.4.</b><br><b>1</b>    |           |  |   |  |   | S |  |   | K | S |   | Q |   |
| <b>BM.4.</b><br><b>1.1</b>  |           |  | T |  |   | S |  |   | K | S |   | Q |   |
| <b>CH.1</b>                 |           |  | T |  | T | S |  |   | K | S |   | Q |   |
| CH.1.<br>1                  |           |  | T |  | T | S |  | R | K | S |   | Q |   |
| CH.2                        |           |  | T |  |   | S |  |   | K | S |   | Q |   |
| BM.5                        |           |  |   |  |   | S |  |   | K |   |   | Q |   |
| BM.6                        |           |  |   |  |   | S |  |   | K |   |   | Q |   |
| <b>BA.2.</b><br><b>75.4</b> |           |  |   |  |   | S |  | R | K |   |   | Q |   |

|                       |           |  |   |   |   |  |   |   |   |   |   |   |   |   |
|-----------------------|-----------|--|---|---|---|--|---|---|---|---|---|---|---|---|
| <b>BR.1</b>           |           |  |   |   | M |  | S |   | R | K |   |   | Q |   |
| BR.1.<br>1            |           |  |   |   | M |  | S |   | R | K |   |   | Q |   |
| BR.1.<br>2            |           |  |   |   | M |  | S |   | R | K | S |   | Q |   |
| <b>BR.2</b>           |           |  | T |   |   |  | S |   | R | K | I |   | Q |   |
| BR.2.<br>1            |           |  | T |   |   |  | S |   | R | K | I |   | Q |   |
| BR.3                  |           |  | T |   |   |  | S |   | R | K |   |   | Q |   |
| BR.4                  |           |  |   |   | T |  | G |   | R | K |   |   | Q |   |
| <b>BA.2.<br/>75.5</b> |           |  |   | T |   |  | S |   |   | K |   |   | Q |   |
| <b>BN.1</b>           | Hydr<br>a |  | T | T |   |  | S |   |   | K |   | S | Q |   |
| <b>BN.1.<br/>1</b>    |           |  | T | T |   |  | S |   |   | K |   | S | Q | P |
| BN.1.<br>1.1          |           |  | T | T |   |  | S |   |   | K |   | S | Q | P |
| <b>BN.1.<br/>2</b>    |           |  | T | T |   |  | S |   |   | K |   | S | Q |   |
| BN.1.<br>2.1          |           |  | T | T |   |  | S |   |   | K |   | S | Q |   |
| <b>BN.1.<br/>3</b>    |           |  | T | T |   |  | S |   |   | K |   | S | Q |   |
| BN.1.<br>3.1          |           |  | T | T |   |  | S |   |   | K |   | S | Q |   |
| BN.1.<br>4            |           |  | T | T |   |  | S |   |   | K |   | S | Q |   |
| BN.1.<br>5            |           |  | T | T |   |  | S |   |   | K |   | S | Q |   |
| BN.1.<br>6            |           |  | T | T |   |  | S |   |   | K |   | S | Q |   |
| BN.1.<br>7            |           |  | T | T |   |  | S |   |   | K |   | S | Q |   |
| <b>BN.2</b>           |           |  |   | T |   |  | S |   |   | K |   |   | Q |   |
| BN.2.<br>1            |           |  |   | T |   |  | S |   |   | K |   | S | Q |   |
| <b>BN.3</b>           |           |  |   | T |   |  | S | D |   | K |   |   | Q |   |
| BN.3.<br>1            |           |  |   | T |   |  | S | D |   | K |   | S | Q |   |
| BN.4                  |           |  |   | T |   |  | S |   |   | K |   | S | Q |   |
| BN.5                  |           |  |   | T |   |  | S |   |   | K |   |   | Q |   |
| BN.6                  |           |  |   | T |   |  | S |   |   | K |   |   | Q |   |

|                        |             |  |   |  |   |   |   |  |   |   |   |  |   |   |
|------------------------|-------------|--|---|--|---|---|---|--|---|---|---|--|---|---|
| <b>BA.2.<br/>75.6</b>  | Dicty<br>s  |  | T |  |   |   | S |  |   | K |   |  | Q |   |
| <b>BY.1</b>            |             |  | T |  |   |   | S |  |   | K | S |  | Q |   |
| <b>BY.1.<br/>1</b>     |             |  | T |  |   |   | S |  | R | K | S |  | Q |   |
| BY.1.<br>1.1           |             |  | T |  |   |   | S |  | R | K | S |  | Q |   |
| <b>BY.1.<br/>2</b>     |             |  | T |  |   |   | S |  |   | K | S |  | Q |   |
| BY.1.<br>2.1           |             |  | T |  |   |   | S |  |   | K | S |  | Q | P |
| <b>BA.2.<br/>75.7</b>  |             |  |   |  |   |   | S |  |   | K | S |  | Q |   |
| <b>BA.2.<br/>75.8</b>  |             |  |   |  |   |   | S |  | Q | K |   |  | Q |   |
| <b>BA.2.<br/>75.9</b>  |             |  | T |  |   |   | S |  |   | K |   |  | Q |   |
| CB.1                   |             |  | T |  |   |   | S |  |   | K | V |  | Q |   |
| <b>BA.2.<br/>75.10</b> |             |  |   |  |   |   | S |  |   | K |   |  | Q |   |
| <b>BA.2.<br/>76</b>    |             |  | T |  |   |   |   |  |   |   |   |  |   |   |
| <b>BA.4</b>            |             |  |   |  |   |   |   |  | R |   | V |  | Q |   |
| <b>BA.4.<br/>1</b>     |             |  |   |  |   |   |   |  | R |   | V |  | Q |   |
| <b>BA.4.<br/>1.8</b>   |             |  | T |  |   |   |   |  | R |   | V |  | Q |   |
| <b>BA.4.<br/>1.9</b>   | Cetus       |  | T |  |   |   |   |  | R |   | V |  | Q |   |
| <b>BA.4.<br/>1.10</b>  |             |  | T |  |   |   |   |  | R |   | V |  | Q |   |
| CS.1                   |             |  | T |  | R |   |   |  | R |   | V |  | Q |   |
| <b>BA.4.<br/>6</b>     | Aeter<br>na |  | T |  |   |   |   |  | R |   | V |  | Q |   |
| <b>BA.4.<br/>6.1</b>   |             |  | T |  |   |   |   |  | R |   | V |  | Q |   |
| <b>BA.4.<br/>6.2</b>   |             |  | T |  |   | A |   |  | R |   | V |  | Q |   |
| <b>BA.4.<br/>6.3</b>   |             |  | T |  |   | N |   |  | R | K | V |  | Q |   |
| <b>BA.4.<br/>6.4</b>   |             |  | T |  |   |   |   |  | R |   | V |  | Q |   |

|                  |             |  |   |  |   |  |  |  |   |   |   |  |   |  |
|------------------|-------------|--|---|--|---|--|--|--|---|---|---|--|---|--|
| <b>BA.4.6.5</b>  |             |  | T |  |   |  |  |  | R |   | V |  | Q |  |
| DC.1             |             |  | T |  |   |  |  |  | R | S | V |  | Q |  |
| <b>BA.4.7</b>    |             |  | T |  |   |  |  |  | R |   | V |  | Q |  |
| <b>BA.4.8</b>    |             |  |   |  |   |  |  |  | R |   | V |  | Q |  |
| <b>BA.5.1</b>    |             |  |   |  |   |  |  |  | R |   | V |  | Q |  |
| <b>BA.5.1</b>    | Sphinx<br>x |  |   |  |   |  |  |  | R |   | V |  | Q |  |
| <b>BA.5.1.18</b> |             |  | T |  |   |  |  |  | R |   | V |  | Q |  |
| <b>BA.5.1.19</b> |             |  |   |  |   |  |  |  | R |   | V |  | Q |  |
| <b>BA.5.1.20</b> |             |  | T |  |   |  |  |  | R |   | V |  | Q |  |
| <b>BA.5.1.21</b> |             |  |   |  |   |  |  |  | R |   | V |  | Q |  |
| <b>BT.1</b>      |             |  |   |  |   |  |  |  | R |   | V |  | Q |  |
| <b>BT.2</b>      |             |  |   |  |   |  |  |  | R |   | V |  | Q |  |
| <b>BA.5.1.22</b> |             |  |   |  |   |  |  |  | R |   | V |  | Q |  |
| <b>DH.1</b>      |             |  |   |  |   |  |  |  | R |   | V |  | Q |  |
| <b>BA.5.1.23</b> |             |  |   |  |   |  |  |  | R |   | V |  | Q |  |
| <b>DE.1</b>      |             |  |   |  |   |  |  |  | R |   | V |  | Q |  |
| <b>DE.2</b>      |             |  | T |  |   |  |  |  | R |   | V |  | Q |  |
| <b>BA.5.1.24</b> |             |  |   |  |   |  |  |  | R |   | V |  | Q |  |
| <b>BA.5.1.25</b> |             |  |   |  |   |  |  |  | R |   | V |  | Q |  |
| <b>BA.5.1.26</b> |             |  | T |  |   |  |  |  | R |   | V |  | Q |  |
| <b>CU.1</b>      |             |  | T |  |   |  |  |  | R |   | V |  | Q |  |
| <b>BA.5.1.27</b> |             |  | T |  |   |  |  |  | R |   | V |  | Q |  |
| <b>BA.5.1.28</b> |             |  | T |  |   |  |  |  | R |   | V |  | Q |  |
| <b>BA.5.1.29</b> |             |  |   |  | N |  |  |  | R |   | V |  | Q |  |
| <b>CL.1</b>      |             |  |   |  |   |  |  |  | R | K | V |  | Q |  |
| <b>BA.5.1.30</b> |             |  |   |  |   |  |  |  | R |   | V |  | Q |  |

|                 |          |  |   |  |  |  |   |  |   |  |   |  |   |  |
|-----------------|----------|--|---|--|--|--|---|--|---|--|---|--|---|--|
| <b>BA.5.2</b>   | Triton   |  |   |  |  |  |   |  | R |  | V |  | Q |  |
| <b>BA.5.2.1</b> |          |  |   |  |  |  |   |  | R |  | V |  | Q |  |
| <b>BF.1</b>     |          |  |   |  |  |  |   |  | R |  | V |  | Q |  |
| BF.1.1          |          |  |   |  |  |  |   |  | R |  | V |  | Q |  |
| BF.2            |          |  |   |  |  |  |   |  | R |  | V |  | Q |  |
| <b>BF.3</b>     |          |  |   |  |  |  |   |  | R |  | V |  | Q |  |
| BF.3.1          |          |  |   |  |  |  | S |  | R |  | V |  | Q |  |
| BF.4            |          |  |   |  |  |  |   |  | R |  | V |  | Q |  |
| BF.5            |          |  |   |  |  |  |   |  | R |  | V |  | Q |  |
| BF.6            |          |  |   |  |  |  |   |  | R |  | V |  | Q |  |
| <b>BF.7</b>     | Minotaur |  | T |  |  |  |   |  | R |  | V |  | Q |  |
| BF.7.1          |          |  | T |  |  |  |   |  | R |  | V |  | Q |  |
| BF.7.2          |          |  | T |  |  |  |   |  | R |  | I |  | Q |  |
| BF.7.3          |          |  | T |  |  |  |   |  | R |  | V |  | Q |  |
| <b>BF.7.4</b>   |          |  | T |  |  |  |   |  | R |  | V |  | Q |  |
| BF.7.4.1        |          |  | T |  |  |  |   |  | R |  | V |  | Q |  |
| BF.7.4.2        |          |  | T |  |  |  |   |  | R |  | V |  | Q |  |
| <b>BF.7.5</b>   |          |  | T |  |  |  |   |  | R |  | V |  | Q |  |
| BF.7.5.1        |          |  | T |  |  |  |   |  | R |  | V |  | Q |  |
| BF.7.6          |          |  | T |  |  |  |   |  | R |  | V |  | Q |  |
| BF.7.7          |          |  | T |  |  |  |   |  | R |  | V |  | Q |  |
| BF.7.8          |          |  | T |  |  |  |   |  | R |  | V |  | Q |  |
| BF.7.9          |          |  | T |  |  |  |   |  | R |  | V |  | Q |  |
| BF.7.10         |          |  | T |  |  |  |   |  | R |  | V |  | Q |  |

|                     |            |  |   |  |   |  |  |   |   |  |   |  |   |  |
|---------------------|------------|--|---|--|---|--|--|---|---|--|---|--|---|--|
| BF.7.<br>11         |            |  | T |  |   |  |  |   | R |  | V |  | Q |  |
| BF.7.<br>12         |            |  | T |  |   |  |  |   | R |  | V |  | Q |  |
| <b>BF.7.<br/>13</b> |            |  | T |  |   |  |  |   | R |  | V |  | Q |  |
| BF.7.<br>13.1       |            |  | T |  |   |  |  |   | R |  | V |  | Q |  |
| BF.7.<br>13.2       |            |  | T |  |   |  |  |   | R |  | V |  | Q |  |
| BF.8                |            |  |   |  |   |  |  |   | R |  | V |  | Q |  |
| BF.9                |            |  |   |  |   |  |  |   | R |  | V |  | Q |  |
| BF.10               |            |  |   |  |   |  |  |   | R |  | V |  | Q |  |
| <b>BF.11</b>        | Pytho<br>n |  | T |  |   |  |  |   | R |  | V |  | Q |  |
| BF.11<br>.1         |            |  | T |  |   |  |  |   | R |  | V |  | Q |  |
| BF.11<br>.2         |            |  | T |  |   |  |  |   | R |  | V |  | Q |  |
| BF.11<br>.3         |            |  | T |  |   |  |  |   | R |  | V |  | Q |  |
| BF.11<br>.4         |            |  | T |  |   |  |  |   | R |  | V |  | Q |  |
| BF.11<br>.5         |            |  | T |  |   |  |  |   | R |  | V |  | Q |  |
| BF.12               |            |  |   |  |   |  |  |   | R |  | I |  | Q |  |
| BF.13               |            |  | S |  |   |  |  |   | R |  | V |  | Q |  |
| BF.14               |            |  |   |  |   |  |  | D | R |  | V |  | Q |  |
| BF.15               |            |  |   |  |   |  |  |   | R |  | V |  | Q |  |
| BF.16               |            |  |   |  | R |  |  |   | R |  | V |  | Q |  |
| BF.17               |            |  |   |  |   |  |  |   | R |  | V |  | Q |  |
| BF.18               |            |  |   |  |   |  |  |   | R |  | V |  | Q |  |
| BF.19               |            |  |   |  |   |  |  |   | R |  | V |  | Q |  |
| BF.20               |            |  |   |  |   |  |  |   | R |  | V |  | Q |  |
| BF.21               |            |  |   |  |   |  |  |   | R |  | V |  | Q |  |
| BF.22               |            |  |   |  |   |  |  |   | R |  | V |  | Q |  |
| BF.23               |            |  |   |  |   |  |  |   | R |  | V |  | Q |  |
| BF.24               |            |  |   |  |   |  |  |   | R |  | V |  | Q |  |
| BF.25               |            |  |   |  | A |  |  |   | R |  | V |  | Q |  |
| BF.26               |            |  |   |  |   |  |  |   | R |  | V |  | Q |  |
| BF.27               |            |  |   |  |   |  |  |   | R |  | V |  | Q |  |
| BF.28               |            |  |   |  |   |  |  |   | R |  | V |  | Q |  |



|              |  |  |   |  |   |   |   |  |   |   |   |  |   |  |
|--------------|--|--|---|--|---|---|---|--|---|---|---|--|---|--|
| BF.29        |  |  |   |  |   |   |   |  | R |   | V |  | Q |  |
| BF.30        |  |  | T |  |   |   |   |  | R |   | V |  | Q |  |
| <b>BF.31</b> |  |  |   |  |   |   |   |  | R |   | V |  | Q |  |
| BF.31        |  |  |   |  |   |   |   |  | R |   | V |  | Q |  |
| .1           |  |  |   |  |   |   |   |  | R |   | V |  | Q |  |
| BF.32        |  |  |   |  |   |   | D |  | R |   | V |  | Q |  |
| BF.33        |  |  | I |  |   |   |   |  | R | K | V |  | Q |  |
| BF.34        |  |  | T |  |   |   |   |  | R |   | V |  | Q |  |
| <b>BA.5.</b> |  |  |   |  |   |   |   |  |   |   |   |  |   |  |
| <b>2.3</b>   |  |  |   |  |   |   |   |  | R |   | V |  | Q |  |
| BZ.1         |  |  |   |  |   |   |   |  | R |   | V |  | Q |  |
| <b>BA.5.</b> |  |  |   |  |   |   |   |  |   |   |   |  |   |  |
| <b>2.6</b>   |  |  | T |  |   |   |   |  | R |   | V |  | Q |  |
| <b>CP.1</b>  |  |  | T |  |   |   |   |  | R |   | V |  | Q |  |
| CP.1.        |  |  |   |  |   |   |   |  |   |   |   |  |   |  |
| 1            |  |  | T |  | A |   |   |  | R |   | V |  | Q |  |
| CP.1.        |  |  |   |  |   |   |   |  |   |   |   |  |   |  |
| 2            |  |  | T |  |   |   |   |  | R |   | V |  | Q |  |
| CP.1.        |  |  |   |  |   |   |   |  |   |   |   |  |   |  |
| 3            |  |  | T |  |   | S |   |  | R |   | V |  | Q |  |
| CP.2         |  |  | T |  |   |   |   |  | R |   | V |  | Q |  |
| CP.3         |  |  | T |  |   |   |   |  | R | Y | V |  | Q |  |
| CP.4         |  |  | T |  |   |   |   |  | R |   | V |  | Q |  |
| CP.5         |  |  | T |  |   |   |   |  | R |   | V |  | Q |  |
| CP.6         |  |  | T |  |   |   |   |  | R |   | V |  | Q |  |
| <b>BA.5.</b> |  |  |   |  |   |   |   |  |   |   |   |  |   |  |
| <b>2.7</b>   |  |  |   |  | M |   |   |  | R |   | V |  | Q |  |
| CY.1         |  |  |   |  | M |   |   |  | R | K | V |  | Q |  |
| BA.5.        |  |  |   |  |   |   |   |  |   |   |   |  |   |  |
| 2.13         |  |  | T |  |   |   |   |  | R |   | V |  | Q |  |
| <b>BA.5.</b> |  |  |   |  |   |   |   |  |   |   |   |  |   |  |
| <b>2.16</b>  |  |  |   |  |   |   |   |  | R |   | V |  | Q |  |
| BU.1         |  |  |   |  | M |   |   |  | R | K | V |  | Q |  |
| BU.2         |  |  |   |  | A |   |   |  | R |   | V |  | Q |  |
| BU.3         |  |  |   |  |   |   | D |  | R |   | V |  | Q |  |
| <b>BA.5.</b> |  |  |   |  |   |   |   |  |   |   |   |  |   |  |
| <b>2.18</b>  |  |  |   |  | R |   |   |  | R |   | V |  | Q |  |
| <b>CR.1</b>  |  |  | T |  | R |   |   |  | R |   | V |  | Q |  |
| CR.1.        |  |  |   |  |   |   |   |  |   |   |   |  |   |  |
| 1            |  |  | T |  | R |   |   |  | R |   | V |  | Q |  |
| CR.1.        |  |  |   |  |   |   |   |  |   |   |   |  |   |  |
| 2            |  |  | T |  | R | A |   |  | R |   | V |  | Q |  |
| CR.2         |  |  |   |  | R |   |   |  | R |   | V |  | Q |  |

|                       |  |  |   |  |   |   |  |   |   |   |   |  |   |  |
|-----------------------|--|--|---|--|---|---|--|---|---|---|---|--|---|--|
| BA.5.<br>2.19         |  |  |   |  |   |   |  |   | R |   | V |  | Q |  |
| <b>BA.5.<br/>2.20</b> |  |  |   |  |   |   |  |   | R |   | V |  | Q |  |
| BV.1                  |  |  |   |  |   |   |  |   | R |   | V |  | Q |  |
| BV.2                  |  |  |   |  | N |   |  |   | R |   | V |  | Q |  |
| <b>BA.5.<br/>2.21</b> |  |  |   |  |   |   |  |   | R |   | V |  | Q |  |
| CN.1                  |  |  |   |  |   |   |  | D | R |   | V |  | Q |  |
| BA.5.<br>2.22         |  |  |   |  |   |   |  |   | R |   | V |  | Q |  |
| BA.5.<br>2.23         |  |  |   |  |   | A |  |   | R |   | V |  | Q |  |
| <b>BA.5.<br/>2.24</b> |  |  |   |  | N |   |  |   | R |   | V |  | Q |  |
| CK.1                  |  |  |   |  | N |   |  |   | R | K | V |  | Q |  |
| <b>CK.2</b>           |  |  |   |  | N |   |  |   | R |   | V |  | Q |  |
| <b>CK.2.<br/>1</b>    |  |  |   |  | N |   |  |   | R | K | V |  | Q |  |
| <b>CK.2.<br/>1.1</b>  |  |  |   |  | N |   |  |   | R | K | V |  | Q |  |
| DG.1                  |  |  |   |  | N |   |  |   | R | K | V |  | Q |  |
| CK.3                  |  |  |   |  | N |   |  |   | R | K | V |  | Q |  |
| <b>BA.5.<br/>2.25</b> |  |  | R |  | T |   |  |   | R |   | V |  | Q |  |
| DB.1                  |  |  | T |  | T |   |  |   | R | K | V |  | Q |  |
| DB.2                  |  |  | R |  | T |   |  |   | R |   | V |  | Q |  |
| <b>BA.5.<br/>2.26</b> |  |  |   |  |   |   |  |   | R |   | V |  | Q |  |
| CG.1                  |  |  |   |  | M |   |  |   | R |   | V |  | Q |  |
| <b>BA.5.<br/>2.27</b> |  |  |   |  |   |   |  |   | R |   | V |  | Q |  |
| CF.1                  |  |  |   |  |   |   |  |   | R |   | V |  | Q |  |
| BA.5.<br>2.28         |  |  |   |  |   |   |  |   | R |   | V |  | Q |  |
| BA.5.<br>2.29         |  |  |   |  |   |   |  |   | R |   | V |  | Q |  |
| BA.5.<br>2.30         |  |  |   |  |   |   |  | D | R |   | V |  | Q |  |
| <b>BA.5.<br/>2.31</b> |  |  |   |  |   |   |  |   | R |   | V |  | Q |  |
| CD.1                  |  |  |   |  |   |   |  | D | R |   | V |  | Q |  |
| CD.2                  |  |  |   |  |   |   |  |   | R |   | V |  | Q |  |

|                       |              |  |   |   |   |  |  |   |   |   |   |   |   |  |
|-----------------------|--------------|--|---|---|---|--|--|---|---|---|---|---|---|--|
| BA.5.<br>2.32         |              |  |   |   |   |  |  | D | R |   | V |   | Q |  |
| <b>BA.5.<br/>2.33</b> |              |  |   |   |   |  |  |   | R |   | V |   | Q |  |
| CE.1                  |              |  | I |   |   |  |  |   | R |   | V |   | Q |  |
| BA.5.<br>2.34         |              |  | T |   |   |  |  |   | R |   | V |   | Q |  |
| BA.5.<br>2.35         |              |  | T |   |   |  |  |   | R |   | V |   | Q |  |
| <b>BA.5.<br/>2.36</b> |              |  |   |   | T |  |  |   | R |   | V |   | Q |  |
| CT.1                  |              |  |   | T | T |  |  |   | R |   | V |   | Q |  |
| BA.5.<br>2.37         |              |  |   |   |   |  |  |   | R |   | V |   | Q |  |
| <b>BA.5.<br/>2.38</b> |              |  |   |   |   |  |  |   | R |   | V |   | Q |  |
| DA.1                  |              |  | T |   |   |  |  |   | R |   | V |   | Q |  |
| BA.5.<br>2.39         |              |  | T |   |   |  |  |   | R |   | V |   | Q |  |
| BA.5.<br>2.40         |              |  |   |   |   |  |  | D | R |   | V |   | Q |  |
| BA.5.<br>2.41         |              |  |   |   | R |  |  |   | R |   | V |   | Q |  |
| <b>BA.5.<br/>3</b>    |              |  |   |   |   |  |  |   | R |   | V |   | Q |  |
| <b>BA.5.<br/>3.1</b>  |              |  |   |   |   |  |  |   | R |   | V |   | Q |  |
| <b>BE.1</b>           |              |  |   |   |   |  |  |   | R |   | V |   | Q |  |
| <b>BE.1.<br/>1</b>    |              |  |   |   |   |  |  |   | R |   | V |   | Q |  |
| <b>BE.1.<br/>1.1</b>  |              |  |   |   | T |  |  |   | R |   | V |   | Q |  |
| <b>BQ.1</b>           | Typh<br>on   |  |   |   | T |  |  |   | R | K | V |   | Q |  |
| <b>BQ.1.<br/>1</b>    | Cerb<br>erus |  | T |   | T |  |  |   | R | K | V |   | Q |  |
| <b>BQ.1.<br/>1.1</b>  |              |  | T |   | T |  |  |   | R | K | V |   | Q |  |
| CZ.1                  |              |  | T |   | T |  |  |   | R | K | V | I | Q |  |
| BQ.1.<br>1.2          |              |  | T |   | T |  |  |   | R | K | V |   | Q |  |
| BQ.1.<br>1.3          |              |  | T |   | T |  |  |   | R | K | V |   | Q |  |

|                       |  |  |   |  |   |  |   |  |   |   |   |  |   |   |
|-----------------------|--|--|---|--|---|--|---|--|---|---|---|--|---|---|
| BQ.1.<br>1.4          |  |  | T |  | T |  |   |  | R | K | V |  | Q |   |
| BQ.1.<br>1.5          |  |  | T |  | T |  |   |  | R | K | V |  | Q |   |
| BQ.1.<br>1.6          |  |  | T |  | T |  |   |  | R | K | V |  | Q |   |
| BQ.1.<br>1.7          |  |  | T |  | T |  |   |  | R | K | V |  | Q |   |
| BQ.1.<br>1.8          |  |  | T |  | T |  |   |  | R | K | V |  | Q |   |
| BQ.1.<br>1.9          |  |  | T |  | T |  |   |  | R | K | V |  | Q |   |
| BQ.1.<br>1.10         |  |  | T |  | T |  |   |  | R | K | V |  | Q |   |
| BQ.1.<br>1.11         |  |  | T |  | T |  |   |  | R | K | V |  | Q | P |
| BQ.1.<br>1.12         |  |  | T |  | T |  |   |  | R | K | V |  | Q | P |
| BQ.1.<br>1.13         |  |  | T |  | T |  |   |  | R | K | V |  | Q |   |
| <b>BQ.1.<br/>1.14</b> |  |  | T |  | T |  |   |  | R | K | V |  | Q |   |
| CW.1                  |  |  | T |  | T |  | S |  | R | K | V |  | Q |   |
| BQ.1.<br>1.15         |  |  | T |  | T |  |   |  | R | K | V |  | Q |   |
| BQ.1.<br>1.16         |  |  | T |  | T |  |   |  | R | K | V |  | Q |   |
| BQ.1.<br>1.17         |  |  | T |  | T |  |   |  | R | K | V |  | Q |   |
| BQ.1.<br>1.18         |  |  | T |  | T |  |   |  | R | K | V |  | Q |   |
| BQ.1.<br>1.19         |  |  | T |  | T |  |   |  | R | K | V |  | Q |   |
| BQ.1.<br>1.20         |  |  | T |  | T |  |   |  | R | K | V |  | Q |   |
| BQ.1.<br>1.21         |  |  | T |  | T |  |   |  | R | K | V |  | Q |   |
| BQ.1.<br>1.22         |  |  | T |  | T |  |   |  | R | K | V |  | Q |   |
| BQ.1.<br>1.23         |  |  | T |  | T |  |   |  | R | K | V |  | Q |   |
| BQ.1.<br>1.24         |  |  | T |  | T |  |   |  | R | K | V |  | Q |   |

|                     |  |  |   |  |   |  |  |  |   |   |   |  |   |   |
|---------------------|--|--|---|--|---|--|--|--|---|---|---|--|---|---|
| BQ.1.<br>2          |  |  |   |  | T |  |  |  | R | K | V |  | Q |   |
| BQ.1.<br>3          |  |  |   |  | T |  |  |  | R | K | V |  | Q |   |
| BQ.1.<br>4          |  |  |   |  | T |  |  |  | R | K | V |  | Q |   |
| BQ.1.<br>5          |  |  |   |  | T |  |  |  | R | K | V |  | Q |   |
| BQ.1.<br>6          |  |  |   |  | T |  |  |  | R | K | V |  | Q |   |
| BQ.1.<br>7          |  |  |   |  | T |  |  |  | R | K | V |  | Q |   |
| <b>BQ.1.<br/>8</b>  |  |  |   |  | T |  |  |  | R | K | V |  | Q |   |
| BQ.1.<br>8.1        |  |  |   |  | T |  |  |  | R | K | V |  | Q |   |
| BQ.1.<br>8.2        |  |  |   |  | T |  |  |  | R | K | V |  | Q |   |
| BQ.1.<br>9          |  |  | T |  | T |  |  |  | R | K | V |  | Q |   |
| <b>BQ.1.<br/>10</b> |  |  |   |  | T |  |  |  | R | K | V |  | Q |   |
| BQ.1.<br>10.1       |  |  |   |  | T |  |  |  | R | K | V |  | Q |   |
| BQ.1.<br>11         |  |  |   |  | T |  |  |  | R | K | V |  | Q |   |
| BQ.1.<br>12         |  |  |   |  | T |  |  |  | R | K | V |  | Q |   |
| BQ.1.<br>13         |  |  |   |  | T |  |  |  | R | K | V |  | Q |   |
| BQ.1.<br>14         |  |  |   |  | T |  |  |  | R | K | V |  | Q |   |
| BQ.1.<br>15         |  |  |   |  | T |  |  |  | R | K | V |  | Q |   |
| BQ.1.<br>16         |  |  |   |  | T |  |  |  | R | K | V |  | Q |   |
| BQ.1.<br>17         |  |  |   |  | M |  |  |  | R | K | V |  | Q |   |
| BQ.1.<br>18         |  |  | T |  | T |  |  |  | R | K | V |  | Q |   |
| BQ.1.<br>19         |  |  |   |  | T |  |  |  | R | K | V |  | Q | P |

|                      |  |  |   |  |   |   |  |   |   |   |   |  |   |  |
|----------------------|--|--|---|--|---|---|--|---|---|---|---|--|---|--|
| BQ.1.<br>20          |  |  |   |  | T |   |  |   | R | K | V |  | Q |  |
| BQ.1.<br>21          |  |  | S |  | T |   |  |   | R | K | V |  | Q |  |
| BQ.1.<br>22          |  |  | T |  | T |   |  |   | R | K | V |  | Q |  |
| BQ.1.<br>23          |  |  |   |  | T |   |  |   | R | K | V |  | Q |  |
| BQ.1.<br>24          |  |  | T |  | T |   |  |   | R | K | V |  | Q |  |
| BQ.1.<br>25          |  |  | T |  | T |   |  |   | R | K | V |  | Q |  |
| BQ.1.<br>26          |  |  |   |  | T |   |  |   | R | K | V |  | Q |  |
| BQ.2                 |  |  |   |  | T |   |  |   | R |   | V |  | Q |  |
| <b>BE.1.<br/>1.2</b> |  |  |   |  |   |   |  |   | R |   | V |  | Q |  |
| CC.1                 |  |  |   |  |   |   |  | D | R |   | V |  | Q |  |
| <b>BE.1.<br/>2</b>   |  |  | T |  |   |   |  |   | R |   | V |  | Q |  |
| BE.1.<br>2.1         |  |  | T |  |   | A |  |   | R |   | V |  | Q |  |
| BE.1.<br>3           |  |  |   |  |   |   |  |   | R |   | V |  | Q |  |
| <b>BE.1.<br/>4</b>   |  |  |   |  |   |   |  |   | R |   | V |  | Q |  |
| BE.1.<br>4.1         |  |  |   |  |   |   |  |   | R |   | V |  | Q |  |
| BE.1.<br>4.2         |  |  | T |  |   |   |  |   | R |   | V |  | Q |  |
| BE.1.<br>4.3         |  |  |   |  |   | A |  |   | R |   | V |  | Q |  |
| BE.1.<br>4.4         |  |  |   |  |   |   |  |   | R |   | V |  | Q |  |
| BE.2                 |  |  |   |  |   |   |  |   | R |   | V |  | Q |  |
| BE.3                 |  |  |   |  |   |   |  |   | R |   | V |  | Q |  |
| <b>BE.4</b>          |  |  |   |  |   |   |  |   | R |   | V |  | Q |  |
| <b>BE.4.<br/>1</b>   |  |  | T |  |   |   |  |   | R |   | V |  | Q |  |
| <b>BE.4.<br/>1.1</b> |  |  | T |  | R |   |  |   | R |   | V |  | Q |  |
| <b>CQ.1</b>          |  |  | T |  | R |   |  |   | R |   | V |  | Q |  |

|                  |         |  |   |  |   |   |   |  |   |   |   |   |   |  |
|------------------|---------|--|---|--|---|---|---|--|---|---|---|---|---|--|
| CQ.1.1           |         |  | T |  | R |   |   |  | R |   | V |   | Q |  |
| CQ.2             |         |  | T |  | R | A |   |  | R |   | V |   | Q |  |
| BE.4.2           |         |  |   |  | N |   |   |  | R | K | V |   | Q |  |
| BE.5             |         |  | T |  |   |   |   |  | R |   | V |   | Q |  |
| BE.6             |         |  | S |  |   |   |   |  | R |   | V |   | Q |  |
| BE.7             |         |  | T |  |   |   |   |  | R |   | V |   | Q |  |
| BE.8             |         |  | T |  |   |   |   |  | R |   | V |   | Q |  |
| BE.9             |         |  |   |  | T |   |   |  | R | K | V |   | Q |  |
| BA.5.3.5         |         |  | T |  |   |   |   |  | R |   | V |   | Q |  |
| <b>BA.5.5</b>    |         |  |   |  |   |   |   |  | R |   | V |   | Q |  |
| BA.5.5.3         |         |  |   |  |   |   |   |  | R |   | V |   | Q |  |
| <b>BA.5.6</b>    |         |  |   |  |   |   |   |  | R |   | V |   | Q |  |
| <b>BA.5.6.2</b>  |         |  |   |  | T |   |   |  | R |   | V |   | Q |  |
| BW.1             |         |  |   |  | T |   |   |  | R | K | V |   | Q |  |
| BA.5.6.3         |         |  | T |  |   |   |   |  | R |   | V |   | Q |  |
| BA.5.6.4         |         |  | E |  |   |   |   |  | R |   | V |   | Q |  |
| <b>BA.5.10</b>   |         |  |   |  |   |   |   |  | R |   | V |   | Q |  |
| <b>BA.5.10.1</b> |         |  | T |  |   |   |   |  | R |   | V |   | Q |  |
| DF.1             |         |  | T |  |   |   |   |  | R |   | V |   | Q |  |
| BA.5.11          |         |  | T |  |   |   |   |  | R |   | V |   | Q |  |
| <b>XBB</b>       | Gryphon |  | T |  |   | P | S |  |   | K | S | S | Q |  |
| <b>XBB.1</b>     |         |  | T |  |   | P | S |  |   | K | S | S | Q |  |
| XBB.1.1          |         |  | T |  |   | P | S |  |   | K | S | S | Q |  |
| XBB.1.2          |         |  | T |  |   | P | S |  |   | K | S | S | Q |  |
| XBB.1.3          |         |  | T |  |   | P | S |  |   | K | S | S | Q |  |

|                   |  |  |   |  |   |   |   |  |   |   |   |   |   |  |
|-------------------|--|--|---|--|---|---|---|--|---|---|---|---|---|--|
| XBB.<br>1.4       |  |  | T |  |   | P | S |  |   | K | S | S | Q |  |
| XBB.<br>1.5       |  |  | T |  |   | P | S |  |   | K | P | S | Q |  |
| XBB.<br>2         |  |  | T |  |   | P | S |  |   | K | S | S | Q |  |
| <b>XBB.<br/>3</b> |  |  | T |  |   | P | S |  |   | K | S | S | Q |  |
| XBB.<br>3.1       |  |  | T |  |   | P | S |  |   | K | S | S | Q |  |
| <b>XBB.<br/>4</b> |  |  | T |  | R | P | S |  |   | K | S | S | Q |  |
| XBB.<br>4.1       |  |  | T |  | R | P | S |  |   | K | S | S | Q |  |
| XBB.<br>5         |  |  | T |  |   | P | S |  |   | K | S | S | Q |  |
| <b>XBC</b>        |  |  |   |  |   |   | S |  |   |   | P |   | Q |  |
| XBC.<br>1         |  |  |   |  |   |   | S |  | M |   | P |   | Q |  |
| XBC.<br>2         |  |  |   |  |   |   | S |  |   |   | P |   | Q |  |
| XBD               |  |  | T |  |   |   | S |  | L | K | S |   | Q |  |
| XBE               |  |  | T |  |   |   |   |  | R |   | V |   | Q |  |
| XBF               |  |  | T |  |   |   | S |  |   | K | P | S | Q |  |
| XBG               |  |  | T |  |   |   |   |  | R |   | V |   | Q |  |
